# Supplementary material for: Characterization of Ozone Production in San Antonio, Texas Using Observations of Total Peroxy Radicals
Source: Copernicus journal article supplement (doi:10.5194/acp-2018-1083), 2018-10-18
Supplement: Supplementary file 1 [file acp-2018-1083-supplement.pdf]

## Supplementary Information

### S1. ECHAMP Inlet Description

A schematic of the ECHAMP inlet used during SAFS is shown in Fig. S1. As described in the main text, the inlet was mounted approximately 15 m above ground level. Solenoid valves were located inside the AML, and gases were transported to the inlet through 22.8 m of 3.2 mm (1/8") OD FEP tubing for NO and copper tubing for N<sub>2</sub> and C<sub>2</sub>H<sub>6</sub>. At any given point in time, one reaction chamber was in amplification mode (C<sub>2</sub>H<sub>6</sub> added upstream, N<sub>2</sub> added downstream) and the other was in background mode (N<sub>2</sub> added upstream, and C<sub>2</sub>H<sub>6</sub> added downstream). This inlet differs from that described in Wood et al. (2017) in that a RO<sub>x</sub> calibration system based on water vapor photolysis (described in Sect. S2.1) was permanently connected to the inlet, so that calibrations could be performed without disturbing sampling from the other instruments. During calibrations, zero air was delivered by 22.8 m of 9.5 mm (3/8") OD FEP tubing to a 12.7 mm (0.5") OD quartz tube inside the inlet box

### S2. XO<sub>2</sub> Calibrations

Total peroxy radicals were calibrated using two methods: photolysis of H<sub>2</sub>O followed by reaction with either H<sub>2</sub> or C<sub>2</sub>H<sub>6</sub> and photolysis of CH<sub>3</sub>I. We described both methods here.

#### S2.1. H<sub>2</sub>O calibration

Calibration of XO<sub>2</sub> was performed via water vapor photolysis at 184.9 nm from a mercury lamp, which produces an equimolar mixture of OH and HO<sub>2</sub>, according to Reaction (RS1) (Schultz et al., 1995; Lanzendorf et al., 1997). The OH was then reacted with H<sub>2</sub> (g) which was added to the zero air flow upstream of the UV illumination to quantitatively convert OH into HO<sub>2</sub> (Reaction RS2).

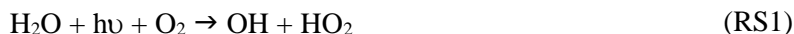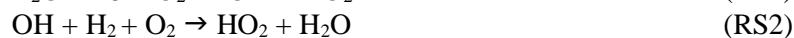

Total XO<sub>2</sub> can then be calculated from Eq. (S1), where brackets denote concentration,  $\sigma$  and  $\phi$  are the absorption cross sections and photolysis quantum yields at 185 nm for the indicated species, respectively. For  $\sigma_{\text{H}_2\text{O}}$  we use  $7.1 \times 10^{-20} \text{ cm}^2 \text{ molecule}^{-1}$  (Cantrell et al., 1997). The effective O<sub>2</sub> absorption cross section depends on both the UV lamp operating conditions and the O<sub>2</sub> column density

27 and therefore and must be characterized for each lamp (Lanzendorf et al., 1997;Creasey et al., 2000). The  
28 Hg lamp used in this study was characterized at the University of Indiana courtesy of Phil Stevens and  
29 found to have an effective cross section of  $1.3 \times 10^{-20} \text{ cm}^2 \text{ molecule}^{-1}$  at an  $\text{O}_2$  column density of  $5 \times 10^{18}$   
30 molecules  $\text{cm}^{-3}$ , within the range of values seen in other studies (Lanzendorf et al., 1997;Creasey et al.,  
31 2000). Quantification of the ozone formed by photolysis of  $\text{O}_2$  at the same wavelength (184.9 nm) serves  
32 as the “chemical actinometer” (Schultz et al., 1995).

$$[HO_2] + [RO_2] = \frac{[O_3][H_2O]\sigma_{H_2O}\phi_{H_2O}}{[O_2]\sigma_{O_2}\phi_{O_2}} \quad (\text{S1})$$

33

34 The typical calibration procedure is as follows:

- 35 1. 8 to 10 LPM of dry zero air (ZA) flow sequentially through 22.8 m of 9.5 mm (3/8”) OD FEP  
36 tubing, an 18 cm long 12.7 mm (0.5”) quartz tube in the ECHAMP inlet box, and into the  
37 sampling manifold (see Fig. S1). Both reaction chambers are operated in background mode, with  
38 NO and  $\text{N}_2$  added upstream of the reaction chambers and ethane added downstream. The  $\text{NO}_2$   
39 concentration measured by the CAPS sensors for this step is solely from impurities in the NO  
40 flow and  $\text{NO}_2$  formed by the termolecular reaction between NO and  $\text{O}_2$ .
- 41 2. A mercury lamp (Jelight 78-2046-2) mounted onto the outside of the quartz tube is then turned  
42 on, providing UV radiation at 184.9 nm and resulting in the production of  $\text{O}_3$  in the ZA flow but  
43 no  $\text{HO}_x$  given the absence of  $\text{H}_2\text{O}_{(\text{g})}$ . A nitrogen purge was placed between the lamp and the  
44 quartz tubing to prevent ozone formation outside of the sampling system. Only a small portion of  
45 the quartz tubing (~1 cm) is exposed to the lamp to control the eventual  $\text{HO}_x$  and  $\text{O}_3$   
46 concentrations. The ozone reacts with the excess NO to produce  $\text{NO}_2$ . The ozone concentration  
47 for Eq. (S1) is thus given by the difference in measured  $[\text{NO}_2]$  between steps 1 and 2 of the  
48 calibration, with a 10% correction applied to account for the dilution by the added flows of NO,  
49  $\text{N}_2$ , and  $\text{C}_2\text{H}_6$ . Typical  $\text{O}_3$  concentrations for calibration were between 0.5 and 2 ppbv, which is

50 easily measured with the CAPS sensors given their typical NO<sub>2</sub> precision of 20 pptv with 10-  
51 second averaging.

52 3. A portion of the ZA is then sent through a bubbler system with distilled water to humidify the ZA  
53 flow. The H<sub>2</sub>O concentration for Eq. (S1) is calculated using the RH and temperature reading  
54 from the Vaisala probe and the ambient pressure.

55 4. H<sub>2</sub> gas was then added to the mixture at a flow rate of 30 sccm. ECHAMP was then operated in  
56 normal sampling mode, with the two reaction chambers alternating between amplification and  
57 background modes every 60 s.

58 The amplification factor, F, is then determined from the ratio of the observed change in NO<sub>2</sub> signal  
59 during step 4 (amplification mode) to the XO<sub>2</sub> concentration calculated from Eq. (S1).

## 60 61 ***S2.2. CH<sub>3</sub>I calibration***

62 The CH<sub>3</sub>I photolysis method, similar to the acetone photolysis method described in Wood and  
63 Charest (2014) except that methyl iodide is used in place of acetone, produces methyl peroxy radicals  
64 (CH<sub>3</sub>O<sub>2</sub>) by the UV photolysis of CH<sub>3</sub>I(g):

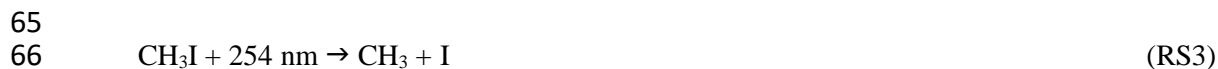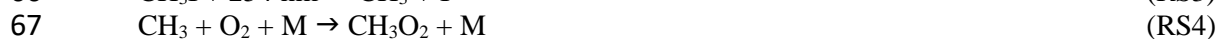

68  
69 In both cases, the peroxy radical concentration is quantified simply by the increase in NO<sub>2</sub> following  
70 reaction of the peroxy radicals with excess NO. The concentration quantification does not rely on  
71 spectroscopic parameters or direct actinometry of the UV source, but instead on the accuracy of the NO<sub>2</sub>  
72 measurements by the CAPS, which we trace to the absorption cross section of O<sub>3</sub> at 254 nm, and the  
73 relative rate constants for reactions.

74 The source of CH<sub>3</sub>I is a permeation tube (KynTek, 1.8 μg/min permeation rate at 35° C), held at  
75 55° C. We flow approximately 100 sccm of N<sub>2</sub> through the permeation tube and dilute this into a larger  
76 flow of 8 LPM of either dry or humidified ultra zero air, resulting in an estimated CH<sub>3</sub>I mixing ratio of 80  
77 ppbv based on the manufacturer-stated permeation rate and assuming the permeation rate is twice as high

78 at 55° C. This diluted CH<sub>3</sub>I then enters a Pyrex photolysis chamber (volume 50 cm<sup>3</sup>) into which an “O<sub>3</sub>-  
79 free” mercury lamp is inserted (Jelight model 81-3306-2, all 185 nm radiation blocked).

80 When these CH<sub>3</sub>O<sub>2</sub> radicals enter the reaction chamber that is in “background” mode, i.e., with  
81 the C<sub>2</sub>H<sub>6</sub> added downstream of the NO addition, allowing time for all sampled RO<sub>x</sub> to be converted to  
82 HONO, the following reactions occur:

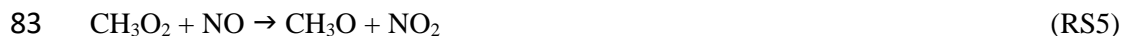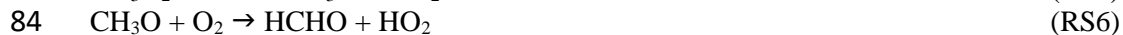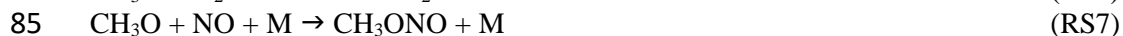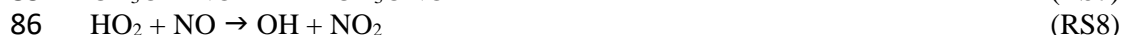

87

88 Thus by modulating the CH<sub>3</sub>O<sub>2</sub> source and observing the change in NO<sub>2</sub>, the concentration of CH<sub>3</sub>O<sub>2</sub> can  
89 be calculated based on the overall stoichiometry of Reactions (RS5) through (RS8). Modulating the NO  
90 flow on and off instead of the CH<sub>3</sub>O<sub>2</sub> source would be inferior because it would also remove the NO<sub>2</sub>  
91 already present in the NO flow due to impurities and the termolecular reaction between NO and O<sub>2</sub>. The  
92 CH<sub>3</sub>O<sub>2</sub> flow can be modulated in three ways: 1. Periodically diverting the CH<sub>3</sub>I flow from the perm tube  
93 away from the air dilution flow (but with the zero air still illuminated by the UV lamp), 2. Turning the  
94 UV source on and off, or 3. Periodically having the diluted CH<sub>3</sub>I + zero air flow bypass the UV chamber  
95 and proceed to the ECHAMP inlet.

96 Method 1 is similar to the acetone photolysis method described by Wood and Charest (2014) with the  
97 weakness that it will also remove any interfering species present in the permeation tube output that absorb  
98 blue light, e.g., I<sub>2</sub> or I<sub>3</sub><sup>-</sup> compounds. The advantage of methods 2 and 3 are that any blue-absorbing species  
99 present in the gas mixture will always be present and thus not present an interference. This is important  
100 when using the CAPS monitor to quantify NO<sub>2</sub>, since it measures the total cell absorption at 450 nm  
101 (FWHM 10 nm) and thus is not completely spectroscopically selective to NO<sub>2</sub>. Method 2 suffers from the  
102 time required for the Hg lamp to warm-up. Method 3 is thus our primary method, though we periodically  
103 use methods 1 and 2 as a check. A schematic of the calibration setup is shown in Fig. S4.

104 There are two main parts to the calibration procedure:

105 1. CH<sub>3</sub>I flows through the UV chamber, producing CH<sub>3</sub>O<sub>2</sub> radicals, and the two channels  
106 of ECHAMP are operated in its standard operation mode, each channel alternating  
107 between amplification mode and background mode.

108 2. Both channels are kept in background mode, and the CH<sub>3</sub>O<sub>2</sub> source is modulated as  
109 described above by periodically having the diluted CH<sub>3</sub>I flow bypass the photolysis  
110 chamber.

111  
112 The amplification factor is given by Eq. (S2):

$$113 \quad F = \Delta\text{NO}_2(\text{step1}) / [\text{CH}_3\text{O}_2] \quad (\text{S2})$$

114  
115  
116  $\Delta\text{NO}_2(\text{step1})$  is the difference in [NO<sub>2</sub>] observed by ECHAMP during step 1 of the calibration procedure  
117 and [CH<sub>3</sub>O<sub>2</sub>] is determined by the following equation:

$$118 \quad [\text{CH}_3\text{O}_2] = \Delta\text{NO}_2(\text{step2}) / (1.86 \times 0.92) \quad (\text{S3})$$

119  
120  $\Delta\text{NO}_2(\text{step2})$  is the change in [NO<sub>2</sub>] observed when the CH<sub>3</sub>O<sub>2</sub> source is modulated during step 2. The  
121 factor of 1.86 accounts for the portion of the CH<sub>3</sub>O<sub>2</sub> radicals that form CH<sub>3</sub>ONO upon reaction with  
122 excess NO rather than two NO<sub>2</sub> molecules. This is calculated by Eq. (S4):

$$123 \quad FF = 2 \left\{ \frac{k_{\text{RS6}}[\text{O}_2]}{k_{\text{RS6}}[\text{O}_2] + k_{\text{RS7}}[\text{NO}]} \right\} \quad (\text{S4})$$

124  
125  
126 Where  $k_{\text{RS6}}$  ( $1.9 \times 10^{-15} \text{ cm}^3 \text{ molecule}^{-1} \text{ s}^{-1}$ ) and  $k_{\text{RS7}}$  ( $3.3 \times 10^{-11} \text{ cm}^3 \text{ molecule}^{-1} \text{ s}^{-1}$ ) are the rate constants  
127 for Reactions (RS6) and (RS7), respectively (Atkinson et al., 2006). The factor of 0.92 in Eq. (S2)  
128 accounts for the dilution of the gas by the added N<sub>2</sub>, C<sub>2</sub>H<sub>6</sub>/N<sub>2</sub>, and NO/N<sub>2</sub>.

129 In contrast to the H<sub>2</sub>O photolysis method, this CH<sub>3</sub>I method is an “internal” calibration, i.e. the  
130 concentration determined is the amount that entered the reaction chamber - it does not account for losses  
131 of radicals in the sampling system. Separate wall loss measurements have demonstrated that losses of  
132 CH<sub>3</sub>O<sub>2</sub> in our sampling inlet are negligible (less than 1%) and losses of HO<sub>2</sub> less than 3%. Sampling  
133 losses of CH<sub>3</sub>O<sub>2</sub> and other peroxy radicals, especially HO<sub>2</sub>, will be described in more detail in a future  
134 publication (Anderson et al, in preparation).

135 An example time series of CH<sub>3</sub>I calibration data is shown in Fig. S5 from 31 May 2017. From 10:30  
136 to 10:34 ECHAMP was operating in regular sampling mode (alternating amplification-background  
137 mode), sampling CH<sub>3</sub>O<sub>2</sub> radicals from the CH<sub>3</sub>I photolysis system at 23% RH, with a modulated NO<sub>2</sub>  
138 signal of 4.14 ppbv. From 10:34 to 10:40, the diluted CH<sub>3</sub>I periodically bypassed the UV chamber,  
139 producing a modulated NO<sub>2</sub> signal of 0.37 ppbv. This results in an amplification factor of 19.1. During  
140 field calibrations we typically measure multiple single-point calibrations over a range of RH values. To  
141 confirm instrument linearity we occasionally execute multi-point calibrations over a range of  
142 concentrations at a single RH value.

143 We have also investigated potential interferences due to I<sub>2</sub> formation. I<sub>2</sub> can also be formed following  
144 photolysis of CH<sub>3</sub>I through the following mechanisms as described by Clemitshaw et al (1997):

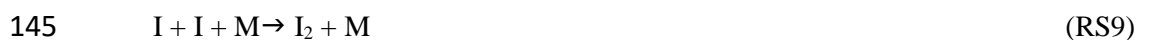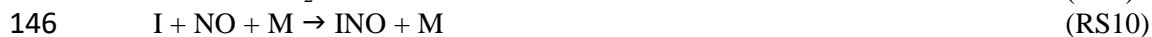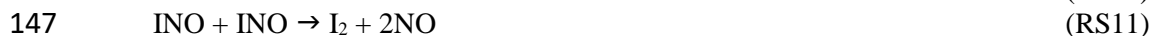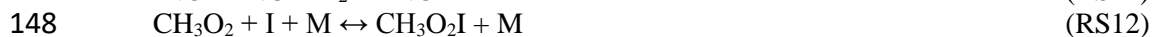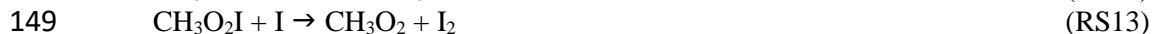

150  
151 The maximum amount of I<sub>2</sub> that could be formed, based on Reactions (RS9), (RS11), and (RS13), is  
152 equal to [CH<sub>3</sub>O<sub>2</sub>]/2. At this amount, I<sub>2</sub> would be an interference as it absorbs blue light and would be  
153 detected as NO<sub>2</sub> by the CAPS sensor (I<sub>2</sub> absorption cross section at 450 nm is ~75% that of NO<sub>2</sub>).

154 To determine experimentally whether there is any observable interference from I<sub>2</sub> formation, we  
155 determined the CH<sub>3</sub>O<sub>2</sub> concentration as described in step 2 of the calibration procedure above. Then, we  
156 turned off the NO flow, effectively stopping amplification. Leaving the lamp on, we then periodically  
157 switched between flowing the CH<sub>3</sub>I through the photolysis chamber and then bypassing photolysis. The  
158 difference in observed signal between these two settings would therefore stem from absorption of blue  
159 light from I<sub>2</sub>. For a flow rate that produced 100 pptv of CH<sub>3</sub>O<sub>2</sub>, concentrations typically used for  
160 calibrating, the I<sub>2</sub> signal, if any, was indistinguishable from the instrument noise, suggesting that at this  
161 concentration, there is negligible interference from I<sub>2</sub> in our calibration. For a flow rate that produced a  
162 CH<sub>3</sub>O<sub>2</sub> concentration of 450 pptv, significantly larger than what is used for calibrations, the CAPS

163 produced an “equivalent” NO<sub>2</sub> signal of ~100 pptv, which would lead to an overestimate in the CH<sub>3</sub>O<sub>2</sub>  
164 concentration of 22%.

165 A simple computer numerical integration, using the above described reactions, was also used to  
166 calculate the variation in INO, I<sub>2</sub>, and CH<sub>3</sub>O<sub>2</sub>I with time. Literature values were used for all rate constants  
167 except for reactions S12 and S13, for which literature values could not be found. Four simulations were  
168 conducted. In the first two, the rate constant for Reaction (RS12) (forward) was estimated as  $1 \times 10^{-11}$   
169 cm<sup>3</sup> molecules<sup>-1</sup> s<sup>-1</sup>, and the rate constant for the reverse (RS12) reaction, k was assumed to be 0. The  
170 initial concentrations of I and CH<sub>3</sub>O<sub>2</sub> were 100 pptv in the first simulation and 1000 pptv in the second.  
171 In the third and fourth simulations, these initial concentrations were kept the same, while the reaction  
172 rates for S12 was increased to  $1 \times 10^{-10}$  cm<sup>3</sup> molecules<sup>-1</sup> s<sup>-1</sup>. The simulations are summarized in Table S1.  
173 Table S2 shows the reaction rate constants for each reaction used in the simulation.

174 Each simulation showed that I<sub>2</sub> formation was negligible for the conditions used in calibration. In  
175 the presence of 1 ppm NO, the simulations indicated that more than 99.9% of the I is rapidly converted to  
176 INO, leaving the INO self-reaction (Reaction RS14) as the only viable route to I<sub>2</sub> formation. The rate  
177 constant for this reaction is  $1.3 \times 10^{-14}$  cm<sup>3</sup> molecules<sup>-1</sup> s<sup>-1</sup> (Atkinson et al., 2007) – 30 times slower than  
178 the effective 2<sup>nd</sup>-order rate constant for the direct recombination of atomic I (Reaction RS9). In addition,  
179 the simulation was repeated including the reaction of I with INO to form I<sub>2</sub> and NO, with no significant  
180 change to the results. We conclude that I<sub>2</sub> formation is negligible under the conditions of our calibrations,  
181 in agreement with our laboratory tests.

### 182 ***S2.3. CH<sub>3</sub>I calibration***

183 Figure S6 compares the CH<sub>3</sub>I (blue circles) and H<sub>2</sub>O photolysis (red, filled triangles) calibration  
184 methods from the AQRP campaign. Both methods agree within uncertainty. Variability in the F values  
185 likely results from variations in mercury lamp intensity, which during the campaign was only measured  
186 when the ozone mixing ratio was quantified (via the change in [NO<sub>2</sub>]) when the lamp was turned off. We  
187 use the CH<sub>3</sub>I derived curve in this analysis because H<sub>2</sub>O photolysis calibrations were all conducted at RH

188 less than ~20%. Because increasing the RH also increases the HO<sub>2</sub> concentration in the H<sub>2</sub>O photolysis  
189 calibration method, the UV lamp output must be attenuated to prevent super-ambient radical  
190 concentrations. During AQRP, a remote method of light attenuation was unavailable, and because the  
191 instrument inlet box was inaccessible without interrupting sampling for other instruments, we could not  
192 alter the H<sub>2</sub>O photolysis setup. For RH greater than 20%, it was found that the resultant HO<sub>2</sub>  
193 concentration was unreasonably high (sometimes exceeding 1 ppbv), and we therefore limit results to  
194 below this value. To demonstrate that the H<sub>2</sub>O photolysis calibration method is applicable over a wider  
195 range of RH, we show results from a subsequent field deployment in Bloomington, IN during July 2017  
196 (Fig. S6, red, open triangles). While we would expect differences in the calibration results because the  
197 instrument configuration was different for this later deployment, the overall relationship between F and  
198 RH is similar at higher RH values.

### 199 *S3. Isoprene*

200  
201 No isoprene standard was available during SAFS for online calibration of the GC-MS  
202 observations. Approximately 6-months after the campaign, a calibration of the same instrument was  
203 conducted during a second campaign using a multi-component mixture, including isoprene and 6 other  
204 hydrocarbons measured during SAFS. To determine a sensitivity for isoprene for SAFS, the sensitivities  
205 for the six hydrocarbons during SAFS was compared to that for the second campaign, in which the GC  
206 setup differed in both sample trap temperature and detector micro channel plate voltage from the SAFS  
207 configuration. The mean ratio of sensitivities from SAFS to the second campaign for the six overlapping  
208 hydrocarbons was  $0.34 \pm 0.10$  ( $1\sigma$ ), while the slope of a regression line of the SAFS sensitivities to the  
209 second campaign sensitivities was 0.38. The isoprene sensitivity for SAFS was then determined by  
210 dividing the sensitivity at the second campaign by the average of these two values (0.36). The total  
211 uncertainty ( $1\sigma$ ) in the isoprene observations is estimated as 31%, with the sensitivity uncertainty  
212 dominating.



213 While there was an in-field calibration for the PTR derived isoprene, it was determined that the  
214 isoprene concentration in this older calibration tank was most likely lower than the stated value, biasing  
215 the PTR results. There were overlapping observations of the PTR and GC derived isoprene values from  
216 the start of the campaign to 19 May, after which the GC trap was damaged. So that we have calibrated  
217 isoprene observations for the duration of the campaign, we have scaled the PTR derived isoprene to GC  
218 values for this overlapping period. The 1-minute averaged PTR data were averaged to the GC sampling  
219 time, and a linear least squares regression was used to determine the relationship. This resulted in a fit  
220 with an  $r^2$  of 0.91 and a relationship between the two instruments as follows:  $[C_5H_8]_{GC} = 0.787[C_5H_8]_{PTR} -$   
221 0.15. The normalized mean bias for this relationship was 7%.

#### 222 ***S4. Model Description***

223 To calculate the  $L_N/Q$  parameter from Sect. 3.2 of the main text, we modeled the photochemistry  
224 with the Framework for 0-D Atmospheric Modeling (F0AM) version 3.1 box model (Wolfe et al., 2016).  
225 The model was run with a subset of the Master Chemical Mechanism (Jenkin et al., 2003;Saunders et al.,  
226 2003) version 3.3.1 (MCMv331) (Jenkin et al., 2015). F0AM was constrained with observations taken  
227 during SAFS of temperature, pressure, water vapor,  $O_3$ ,  $NO_2$ , CO,  $CH_4$ , HCHO, methanol, acetone,  
228 acetaldehyde, isoprene, propane, ethane, ethyne, monoterpenes, toluene, *n*-pentane, *n*-hexane, *n*-heptane,  
229 *n*-octane, xylenes, ethyl benzene, 1,2,4-trimethylbenzene, benzene, and cyclohexane. Because there were  
230 no speciated observations, all monoterpenes were assumed to be  $\alpha$ -pinene. Likewise, observations of  
231 total *m*- and *p*-xylene were assumed to be a 50% mixture. Observational constraints were averaged over  
232 the 2-minute ECHAMP sampling interval, and only intervals with simultaneous observations of  $XO_2$ , CO,  
233  $O_3$ , NO, water vapor, isoprene, and HCHO were used. Data from the GC, which had a sampling  
234 frequency lower than that of ECHAMP, were linearly interpolated to the ECHAMP sampling time. The  
235 modeled intervals were further restricted to sampling at a solar zenith angle (SZA) less than  $80^\circ$ . Missing  
236 data were linearly interpolated in time. For photolysis reactions, the model was constrained to  
237 observations of  $J_{NO_2}$ . Other photolysis rates were determined from a lookup table of values calculated by

238 the TUV model as described in Wolfe et al. (2016). These values were then scaled to the observed  $\text{JNO}_2$ .  
239 The model was run forward in time with a model time-step of 1 hour, with all constrained concentrations  
240 and meteorology held constant but photolysis frequencies varying with time of day. The diurnal cycle  
241 was repeated for 4 days for each set of observations, which was found sufficient to bring  $\text{XO}_2$  into steady  
242 state.

243  
244

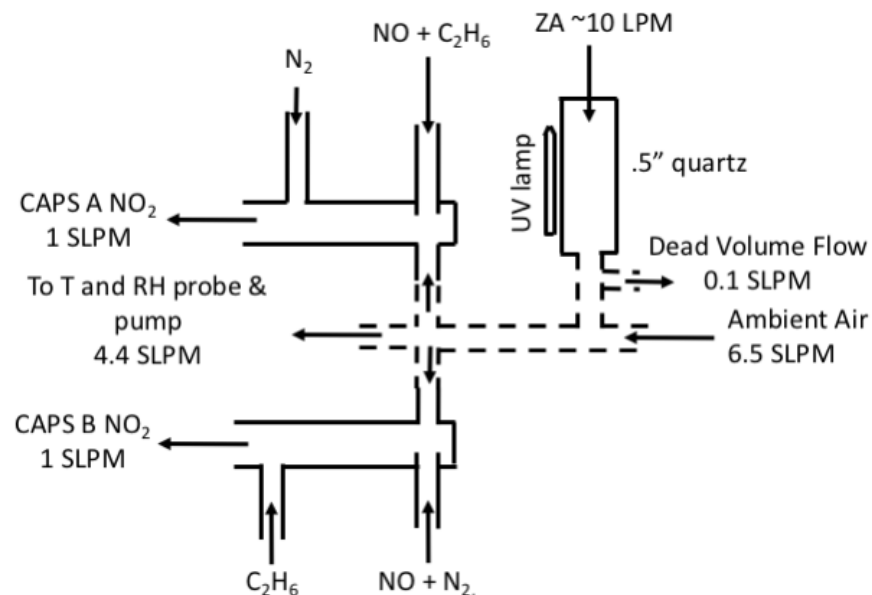

245  
246 **Figure S1:** A schematic of the ECHAMP inlet used during SAFS. Dashed lines represent glass coated in  
247 halocarbon wax. The ZA flow is only used during H<sub>2</sub>O based calibrations. As drawn, the upper reaction  
248 chamber (Chamber A) is in amplification mode (C<sub>2</sub>H<sub>6</sub> added upstream, N<sub>2</sub> added downstream) and  
249 reaction the lower reaction chamber (Chamber B) is in background mode. Every minute, the C<sub>2</sub>H<sub>6</sub> and N<sub>2</sub>  
250 flows are switched so that the reaction chamber that was in amplification mode is then in background  
251 mode and vice versa. The upstream and downstream additions are ~15.2 cm apart, and the reaction  
252 chamber continues for another 66 cm before entering a filter. C<sub>2</sub>H<sub>6</sub> was a 42.2% in N<sub>2</sub> mixture and was  
253 flowed at 35 sccm; NO was a 39.2 ppmv in N<sub>2</sub> mixture and was flowed at 25 sccm. The N<sub>2</sub> flow rate was  
254 35 sccm.

255  
256

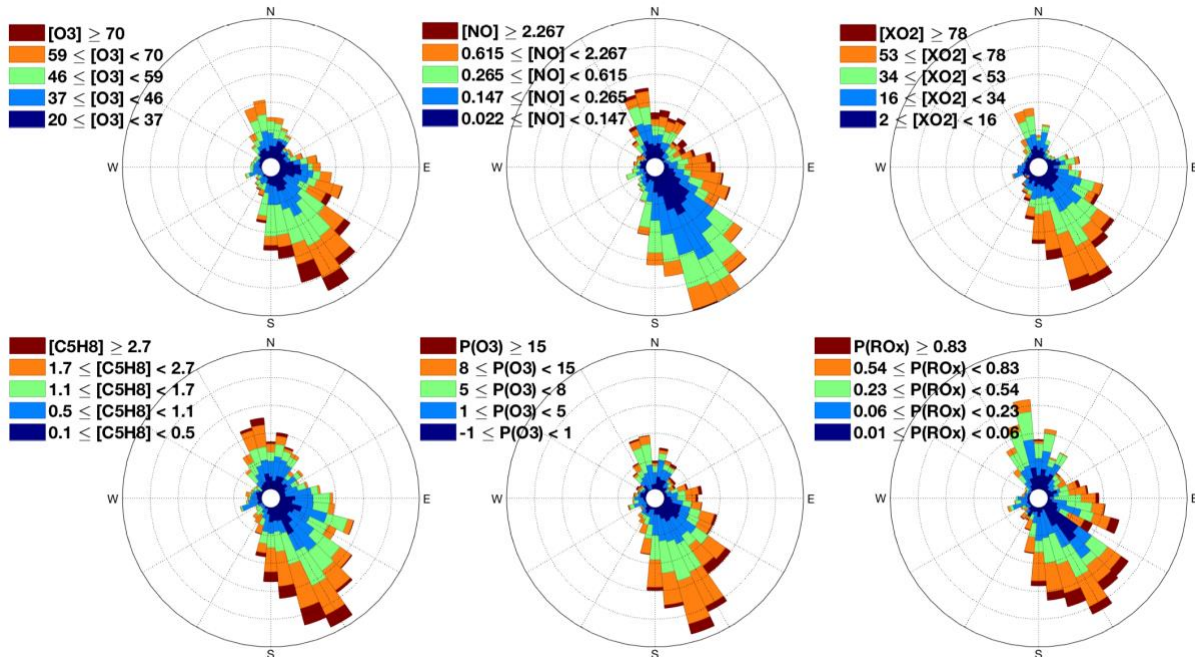

257  
 258 **Figure S2:** Wind roses showing the variation in O<sub>3</sub> (a), NO (b), RO<sub>x</sub> (c), isoprene (d), P(O<sub>3</sub>), and P(HO<sub>x</sub>)  
 259 with direction for all observations at the UTSA site. Observations are separated into their 5<sup>th</sup>, 25<sup>th</sup>, 50<sup>th</sup>,  
 260 75<sup>th</sup>, and 95<sup>th</sup> percentiles for each species.

261  
 262  
 263  
 264  
 265  
 266  
 267

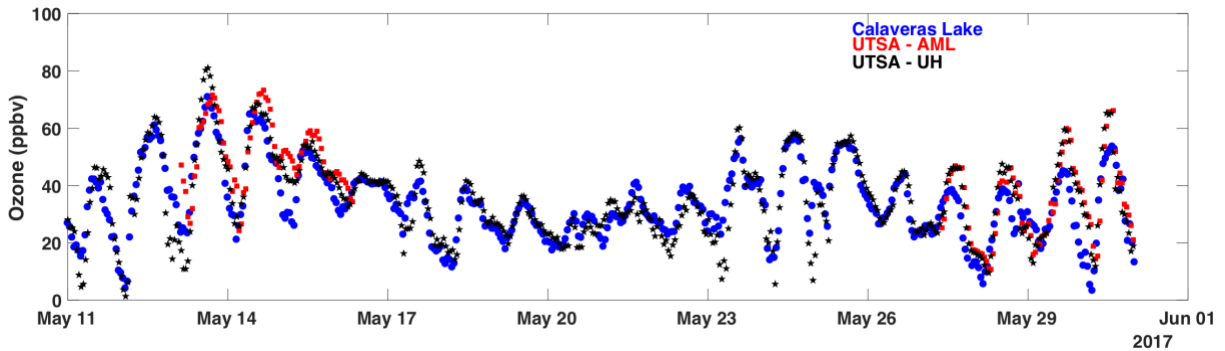

268  
 269 **Figure S3:** One-hour average O<sub>3</sub> at the Calaveras TCEQ monitoring site (blue) and at the UTSA SAFS  
 270 site, including observations from both the AML (red) and by the University of Houston (black).

271

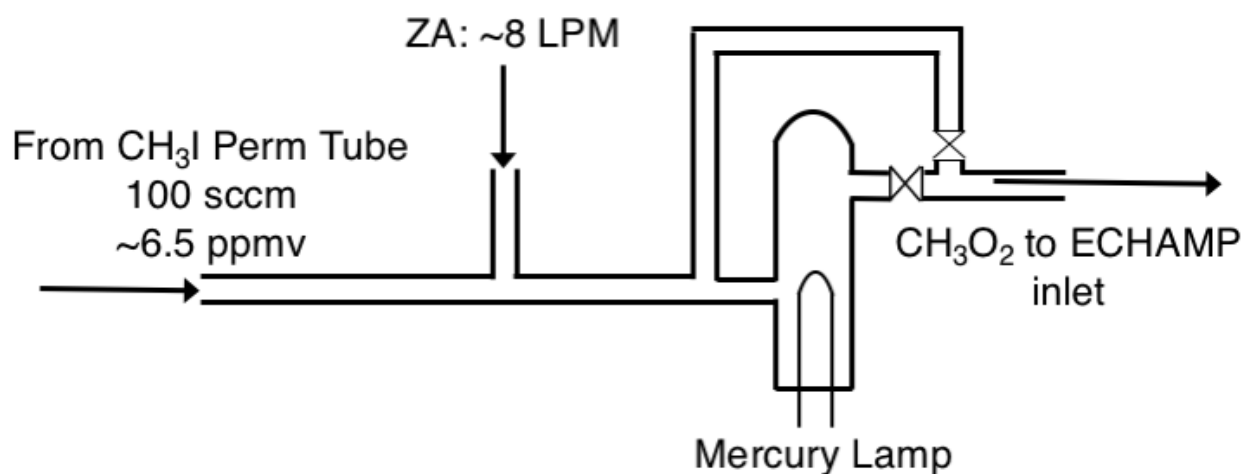

272  
 273 **Figure S4:** A schematic of the CH<sub>3</sub>I calibration setup. Hourglass shapes represent two-way valves. The  
 274 ZA is humidified over a range of RH values from 0% to 80%.

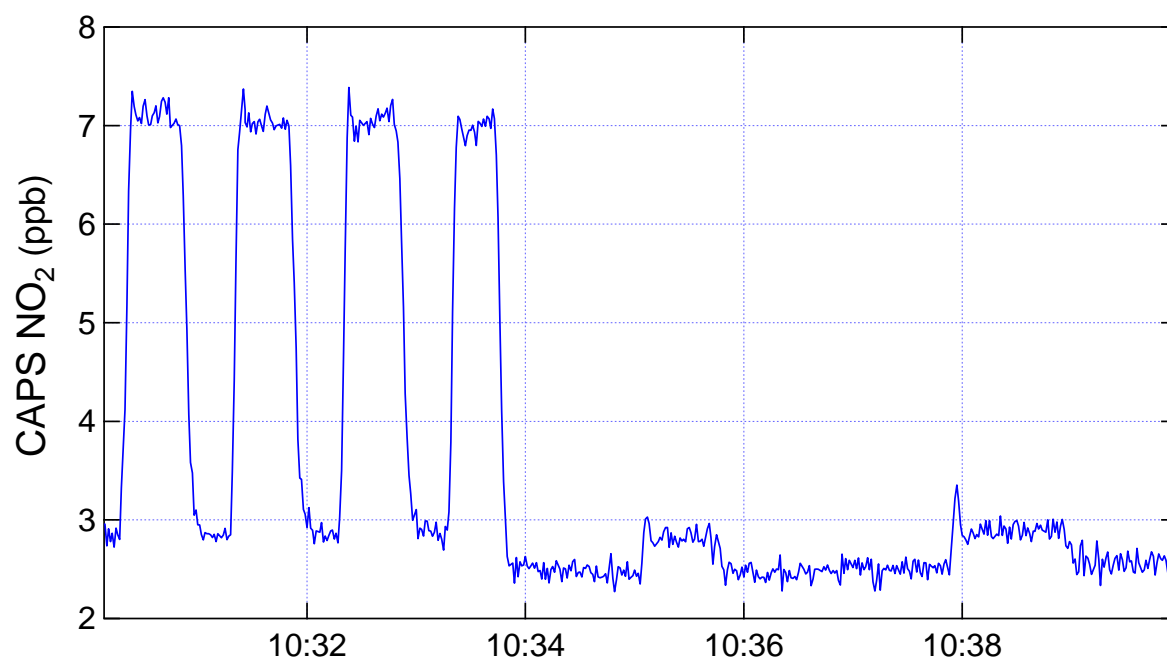

275  
 276 **Figure S5:** An example time series of CH<sub>3</sub>I calibration data from 31 May 2017. From 10:30 to 10:34  
 277 ECHAMP operated in regular amplification mode. From 10:34 to 10:40 ECHAMP was in background  
 278 mode (no amplification) and the CH<sub>3</sub>O<sub>2</sub> source was modulated on and off.

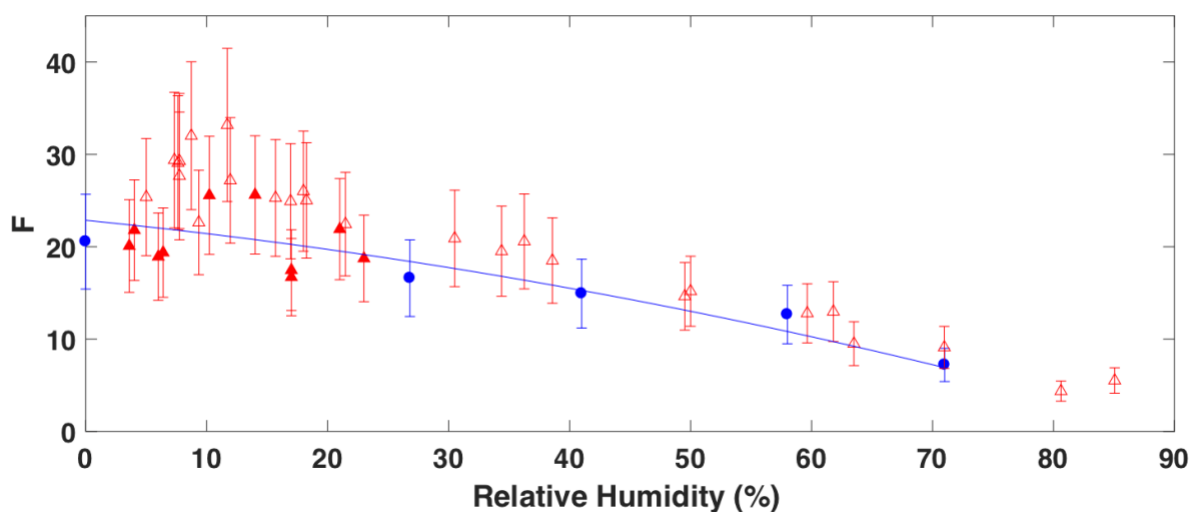

280  
281  
282 **Figure S6:** Calibration curve for ECHAMP during AQR. The results from the CH<sub>3</sub>I (blue circles) H<sub>2</sub>O  
283 photolysis (red, filled triangles) are both shown. In addition, results from an H<sub>2</sub>O photolysis calibration  
284 conducted during a subsequent field deployment are also shown (red, open triangles). Indicated  
285 uncertainties are the ECHAMP measurement uncertainty of 25% (2σ).  
286

287 **Table S1:** Description of the different simulations used to calculate the variation in INO, I<sub>2</sub>, and CH<sub>3</sub>O<sub>2</sub>I  
288 with time in the CH<sub>3</sub>I calibration setup.  $k_{\text{CH}_3\text{O}_2+\text{I}+\text{M}}$  is the rate constant for the forward reaction of reaction  
289 S12.  
290

|                                                                                             | Simulation 1          | Simulation 2          | Simulation 3          | Simulation 4          |
|---------------------------------------------------------------------------------------------|-----------------------|-----------------------|-----------------------|-----------------------|
| $[\text{I}]_0 = [\text{CH}_3\text{O}_2]_0$ (pptv)                                           | 100                   | 1000                  | 100                   | 1000                  |
| $k_{\text{CH}_3\text{O}_2+\text{I}+\text{M}}$ (molecules cm <sup>-3</sup> s <sup>-1</sup> ) | $1.0 \times 10^{-11}$ | $1.0 \times 10^{-11}$ | $1.0 \times 10^{-10}$ | $1.0 \times 10^{-10}$ |

291  
292  
293 **Table S2:** Rate constants at 298 K and sources for the iodine simulations. The reaction rate for Reaction  
294 S12 forward was varied as described in the text and Table S1.

| Reaction                                                                                                                   | $k_i$ (cm <sup>3</sup> molecules <sup>-1</sup> s <sup>-1</sup> ) | Source                 |
|----------------------------------------------------------------------------------------------------------------------------|------------------------------------------------------------------|------------------------|
| $\text{I} + \text{I} \rightarrow \text{I}_2$ (Reaction RS9)                                                                | $3.92 \times 10^{-13}$                                           | Jenkin et al. (1990)   |
| $\text{I} + \text{NO} + \text{M} \rightarrow \text{INO} + \text{M}$ (Reaction RS10)                                        | $1.7 \times 10^{-11}$                                            | Atkinson et al. (2007) |
| $\text{INO} + \text{INO} \rightarrow \text{I}_2 + 2\text{NO}$ (Reaction RS11)                                              | $1.3 \times 10^{-14}$                                            | Atkinson et al. (2007) |
| $\text{CH}_3\text{O}_2 + \text{I} + \text{M} \rightarrow \text{CH}_3\text{O}_2\text{I} + \text{M}$ (Reaction RS12 forward) | $1.0 \times 10^{-11}$                                            | Estimate               |
| $\text{CH}_3\text{O}_2\text{I} + \text{M} \rightarrow \text{CH}_3\text{O}_2 + \text{I} + \text{M}$ (Reaction RS12 reverse) | 0                                                                | Estimate               |
| $\text{CH}_3\text{O}_2\text{I} + \text{I} \rightarrow \text{I}_2 + \text{CH}_3\text{O}_2$ (Reaction RS13)                  | $1.0 \times 10^{-11}$                                            | Estimate               |
| $\text{CH}_3\text{O}_2 + \text{NO} \rightarrow \text{NO}_2 + \text{CH}_3\text{O}$                                          | $7.7 \times 10^{-12}$                                            | Sanders et al. (2011)  |

295  
296  
297  
298  
299  
300  
301

302 **S5. References**

303

304 Anderson, D.C, Pavelec, J., Lindsay, A., Wood, E.C.: Wall Loss Rates and the Use of Nafion  
305 Tubing for Selective Measurement of Peroxy Radicals. In preparation.

306 Atkinson, R., Baulch, D. L., Cox, R. A., Crowley, J. N., Hampson, R. F., Hynes, R. G., Jenkin,  
307 M. E., Rossi, M. J., Troe, J., and Subcommittee, I.: Evaluated kinetic and photochemical data for  
308 atmospheric chemistry: Volume II; gas phase reactions of organic species, *Atmos. Chem. Phys.*,  
309 6, 3625-4055, 10.5194/acp-6-3625-2006, 2006.

310 Atkinson, R., Baulch, D. L., Cox, R. A., Crowley, J. N., Hampson, R. F., Hynes, R. G., Jenkin,  
311 M. E., Rossi, M. J., and Troe, J.: Evaluated kinetic and photochemical data for atmospheric  
312 chemistry: Volume III - gas phase reactions of inorganic halogens, *Atmospheric Chemistry and*  
313 *Physics*, 7, 981-1191, 10.5194/acp-7-981-2007, 2007.

314 Cantrell, C. A., Zimmer, A., and Tyndall, G. S.: Absorption cross sections for water vapor from  
315 183 to 193 nm, *Geophysical Research Letters*, 24, 2195-2198, 10.1029/97gl02100, 1997.

316 Clemitshaw, K. C., Carpenter, L. J., Penkett, S. A., and Jenkin, M. E.: A calibrated peroxy  
317 radical chemical amplifier for ground-based tropospheric measurements, *J. Geophys. Res.*, 102,  
318 25405, 10.1029/97jd01902, 1997.

319 Creasey, D. J., Heard, D. E., and Lee, J. D.: Absorption cross-section measurements of water  
320 vapour and oxygen at 185 nm. Implications for the calibration of field instruments to measure  
321 OH, HO<sub>2</sub> and RO<sub>2</sub> radicals, *Geophysical Research Letters*, 27, 1651-1654,  
322 10.1029/1999gl011014, 2000.

323 Jenkin, M. E., Cox, R. A., Mellouki, A., Lebras, G., and Poulet, G.: Kinetics of the Reaction of  
324 Iodine Atoms with HO<sub>2</sub> Radicals, *Journal of Physical Chemistry*, 94, 2927-2934,  
325 10.1021/j100370a036, 1990.

326 Jenkin, M. E., Saunders, S. M., Wagner, V., and Pilling, M. J.: Protocol for the development of  
327 the Master Chemical Mechanism, MCM v3 (Part B): tropospheric degradation of aromatic  
328 volatile organic compounds, *Atmospheric Chemistry and Physics*, 3, 181-193, 2003.

329 Jenkin, M. E., Young, J. C., and Rickard, A. R.: The MCM v3.3.1 degradation scheme for  
330 isoprene, *Atmospheric Chemistry and Physics*, 15, 11433-11459, 10.5194/acp-15-11433-2015,  
331 2015.

332 Lanzendorf, E. J., Hanisco, T. F., Donahue, N. M., and Wennberg, P. O.: The measurement of  
333 tropospheric OH radicals by laser-induced fluorescence spectroscopy during the POPCORN field  
334 campaign and Intercomparison of tropospheric OH radical measurements by multiple folded  
335 long-path laser absorption and laser induced fluorescence - Comment, *Geophysical Research*  
336 *Letters*, 24, 3037-3038, 10.1029/97gl02899, 1997.

337 Sanders, S. P., Friedl, R. R., Abbatt, J. P. D., Barker, J. R., Burkholder, J. B., Golden, D. M.,  
338 Kolb, C. E., Kurylo, M. J., Moortgat, G. K., Wine, P. H., R.E., H., and Orkin, V. L.: *Chemical*  
339 *Kinetics and Photochemical Data for Use in Atmospheric Studies*, 2011.

- 340 Saunders, S. M., Jenkin, M. E., Derwent, R. G., and Pilling, M. J.: Protocol for the development  
341 of the Master Chemical Mechanism, MCM v3 (Part A): tropospheric degradation of non-  
342 aromatic volatile organic compounds, *Atmospheric Chemistry and Physics*, 3, 161-180, 2003.
- 343 Schultz, M., Heitlinger, M., Mihelcic, D., and Volzthomas, A.: Calibration Source for Peroxy-  
344 Radicals with Built-in Actinometry using H<sub>2</sub>O and O<sub>2</sub> photolysis at 185 nm, *Journal of*  
345 *Geophysical Research-Atmospheres*, 100, 18811-18816, 10.1029/95jd01642, 1995.
- 346 Wolfe, G. M., Marvin, M. R., Roberts, S. J., Travis, K. R., and Liao, J.: The Framework for 0-D  
347 Atmospheric Modeling (F0AM) v3.1, *Geosci. Model Dev.*, 9, 3309-3319, 10.5194/gmd-9-3309-  
348 2016, 2016.
- 349 Wood, E. C., and Charest, J. R.: Chemical Amplification - Cavity Attenuated Phase Shift  
350 Spectroscopy Measurements of Atmospheric Peroxy Radicals, *Analytical Chemistry*, 86, 10266-  
351 10273, 10.1021/ac502451m, 2014.
- 352 Wood, E. C., Deming, B. L., and Kundu, S.: Ethane-Based Chemical Amplification  
353 Measurement Technique for Atmospheric Peroxy Radicals, *Environmental Science &*  
354 *Technology Letters*, 4, 15-19, 10.1021/acs.estlett.6b00438, 2017.  
355
